# Supplementary material
Source: PubMed Central journal article supplement (PMC4904171)
Supplement: supp_mcw043_aob-15516-s01.pdf [file supp_mcw043_aob-15516-s01.pdf]

# Supporting figures

12th November 2015

This document contains for the manuscript “Yellow and anthocyanin pigment interactions in flower colour transitions in the Antirrhineae”. Figures 1-3 show the posterior distribution of parameter estimates from MCMC runs in diversitree. Black lines show the distribution under the full model, and red lines show distributions under the constrained model. Solid lines show distributions for monomorphic taxa only, whilst dashed lines are for datasets including polymorphic taxa. Note the different scales on both the  $x$  and  $y$  axes.

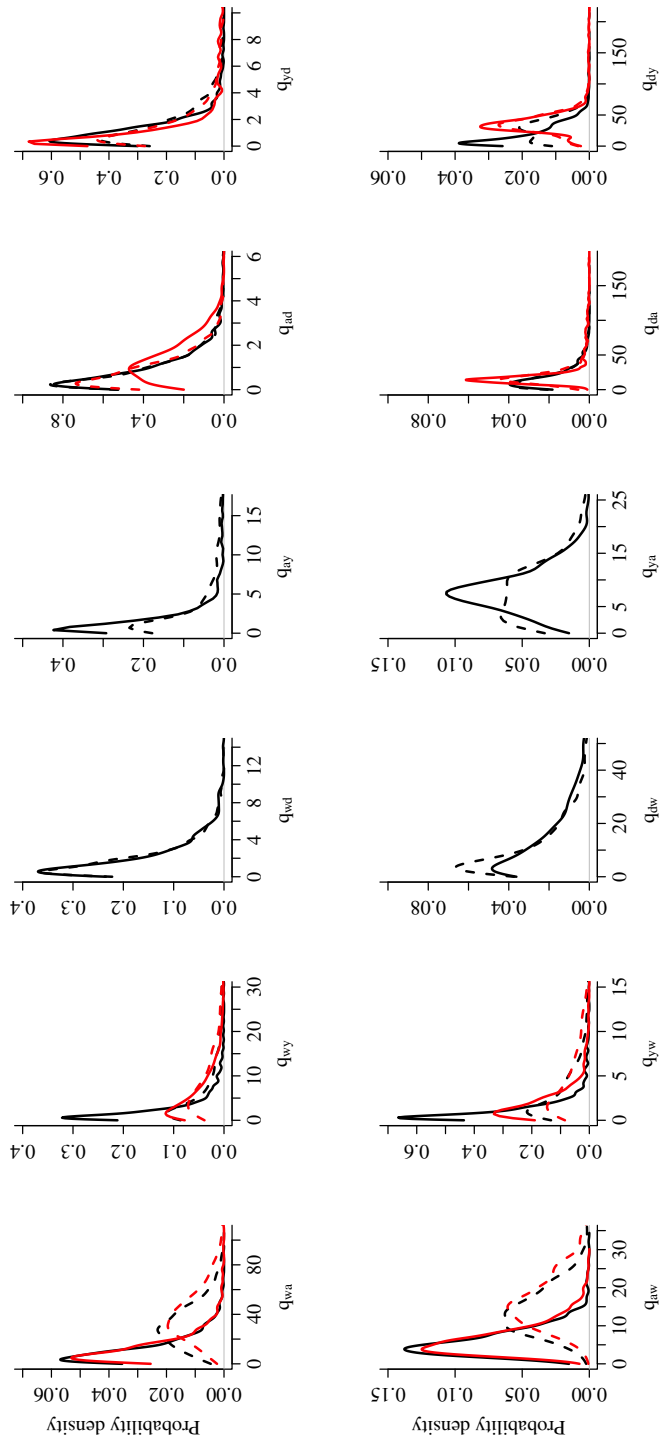

Figure 1: Posterior probability distributions for transition rate estimates.

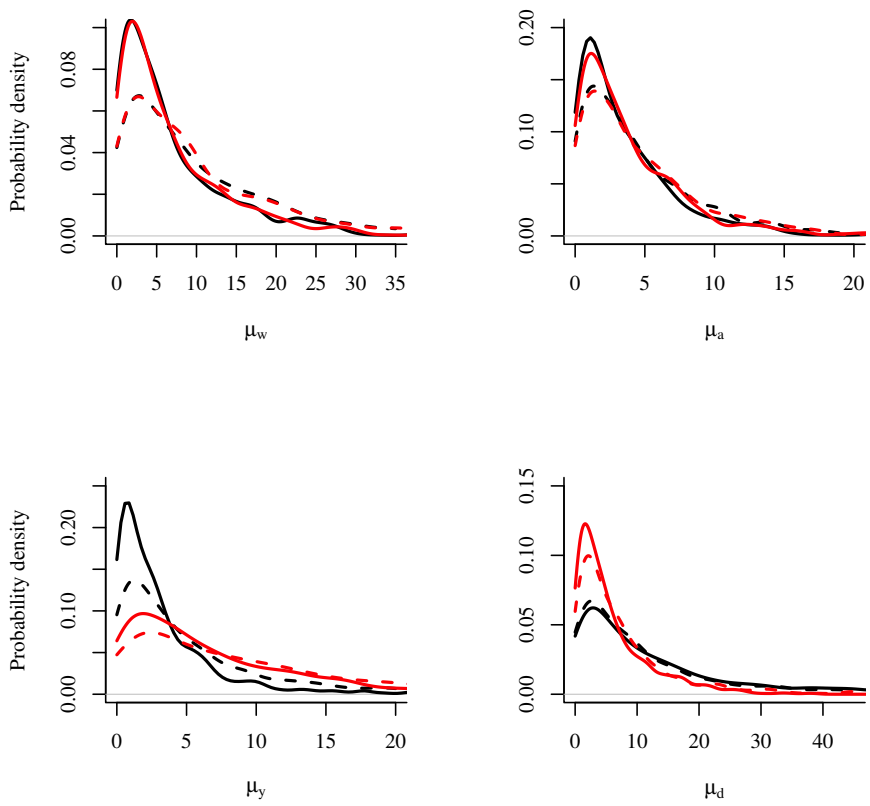

Figure 2: Posterior probability distributions for extinction rates.

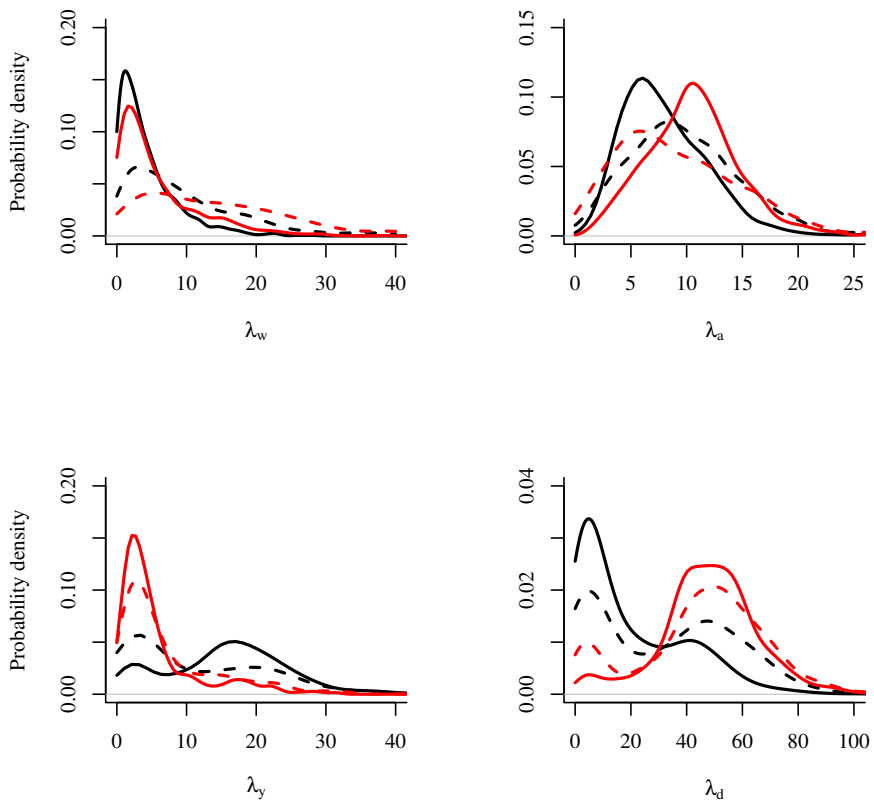

Figure 3: Posterior probability distributions for speciation rates.
